# Initiation of prostate cancer in mice by *Tp53*<sup>R270H</sup>: evidence for an alternative molecular progression

Ruth L. Vinall<sup>1,2,3</sup>, Jane Q. Chen<sup>4</sup>, Neil E. Hubbard<sup>4</sup>, Shola S. Sulaimon<sup>4</sup>, Michael M. Shen<sup>5</sup>, Ralph W. DeVere White<sup>2,3</sup> and Alexander D. Borowsky<sup>3,4,6,\*</sup>

## SUMMARY

*Tp53* mutations are common in human prostate cancer (CaP), occurring with a frequency of ~30% and ~70% in localized and metastatic disease, respectively. In vitro studies have determined several common mutations of *Tp53* that have specific gain-of-function properties in addition to loss of function, including the ability to promote castration-resistant (CR) growth of CaP cells in some contexts. To date, a lack of suitable mouse models has prohibited investigation of the role played by *Tp53* mutations in mediating CaP progression in vivo. Here, we describe the effects of conditional expression of a mutant *Tp53* (*Tp53*<sup>R270H</sup>; equivalent to the human hotspot mutant R273H) in the prostate epithelium of mice. Heterozygous "*Tp53*<sup>LSL-R270H/+</sup>" [129S4(*Trp53*<sup>tm3Tyj</sup>)] and "*Nkx3.1-Cre*" [129S(*Nkx3-1*<sup>tm3(cre)Mms</sup>)] mice with prostate-specific expression of the *Tp53*<sup>R270H</sup> mutation (*p53*<sup>R270H/+</sup> *Nkx3.1-Cre* mice) were bred onto an FVB/N background via speed congenesis to produce strain FVB.129S4(*Trp53*<sup>tm3Tyj/wt</sup>); FVB.129S(*Nkx3-1*<sup>tm3(cre)Mms/wt</sup>) and littermate genotype negative control mice. These mutant mice had significantly increased incidences of prostatic intraepithelial neoplasia (PIN) lesions, and these appeared earlier, compared with the *Nkx3.1* haploinsufficient (*Nkx3.1-Cre* *het*) littermate mice, which did not express the *Tp53* mutation. PIN lesions in these mice showed consistent progression and some developed into invasive adenocarcinoma with a high grade, sarcomatoid or epithelial-mesenchymal transition (EMT) phenotype. PIN lesions were similar to those seen in *PTEN* conditional knockout mice, with evidence of AKT activation concomitant with neoplastic proliferation. However, the invasive tumor phenotype is rarely seen in previously described mouse models of prostatic neoplasia. These data indicate that the *Tp53*<sup>R270H</sup> mutation plays a role in CaP initiation. This finding has not previously been reported. Further characterization of this model, particularly in a setting of androgen deprivation, should allow further insight into the mechanisms by which the *Tp53*<sup>R270H</sup> mutation mediates CaP progression.

## INTRODUCTION

Prostate cancer (CaP) is the leading cancer diagnosis in men in the United States, with new cases for 2012 estimated at 241,740 and over 28,000 estimated annual deaths from the disease (<http://www.cancer.gov/cancertopics/types/prostate>). Clinical cures are achieved in approximately 80% of patients presenting with localized disease; however, once metastasis occurs, response to second-line therapy, usually treatment with an androgen receptor agonist such as bicalutamide, is only 25%, with the response duration lasting for only a few months. Although multiple studies have documented a link between mutations in *Tp53* and disease progression in individuals with CaP, the exact mechanism by which these *Tp53* mutations, in particular gain-of-function (GOF) *Tp53* mutations, mediate disease progression remains to be fully elucidated (Tomkova et al., 2008).

*Tp53*-null mice do not develop prostatic intraepithelial neoplasia (PIN) or CaP; however, acceleration and advancement of tumorigenesis is observed in *Tp53*-null compound models (combining additional oncogenic genetic manipulations), supporting the current dogma that mutations in *Tp53* drive late-stage CaP progression (Navone et al., 1993). Somewhat surprisingly, very few genetically engineered mouse models (GEM) that address the contribution of mutant *Tp53* to CaP progression exist. Transgenic mice expressing *Tp53*<sup>R270H</sup> (equivalent to the human hotspot mutant R273H) under control of the probasin promoter did develop PIN at 1 year of age, but targeted 'knock in' of *Tp53*<sup>R270H</sup> did not result in any observed prostate pathology (Elgavish et al., 2004; Olive et al., 2004).

Owing to the high frequency with which *Tp53* is mutated in human CaP, we aimed to develop and characterize GEM with prostate-specific expression of mutant *Tp53*. Our mouse model challenges the current dogma that mutation in *Tp53* is only important in promoting disease progression in late-stage CaP by demonstrating that *Tp53* can act as an initiating factor. Here we describe the generation and characterization of the *Tp53*<sup>R270H/+</sup> *Nkx3.1-Cre* mouse model. This model, which has been bred onto a fully congenic FVB/NJ strain background, conditionally expresses the R270H *Tp53* GOF mutation in the prostate epithelium of mice, resulting in the development of both PIN and CaP lesions.

## RESULTS

### Validation, congenesis and characterization of *Tp53*<sup>R270H/+</sup> *Nkx3.1-Cre* mice

Fig. 1A shows a schematic representation of the targeting vector and the floxed allele following excision of the STOP cassette by

<sup>1</sup>Department of Pharmaceutical and Biomedical Sciences, California Northstate University College of Pharmacy, Rancho Cordova, CA, USA

<sup>2</sup>Department of Urology, <sup>3</sup>UC Davis Comprehensive Cancer Center, <sup>4</sup>Center for Comparative Medicine, and <sup>5</sup>Department of Pathology and Laboratory Medicine, School of Medicine, University of California at Davis, Sacramento, CA, USA

<sup>6</sup>Departments of Medicine, and Genetics and Development, Herbert Irving Comprehensive Cancer Center, Columbia University Medical Center, New York, NY, USA

\*Author for correspondence (adborowsky@ucdavis.edu)

Received 3 November 2011; Accepted 3 April 2012

© 2012. Published by The Company of Biologists Ltd  
This is an Open Access article distributed under the terms of the Creative Commons Attribution Non-Commercial Share Alike License (<http://creativecommons.org/licenses/by-nc-sa/3.0>), which permits unrestricted non-commercial use, distribution and reproduction in any medium provided that the original work is properly cited and all further distributions of the work or adaptation are subject to the same Creative Commons License terms.

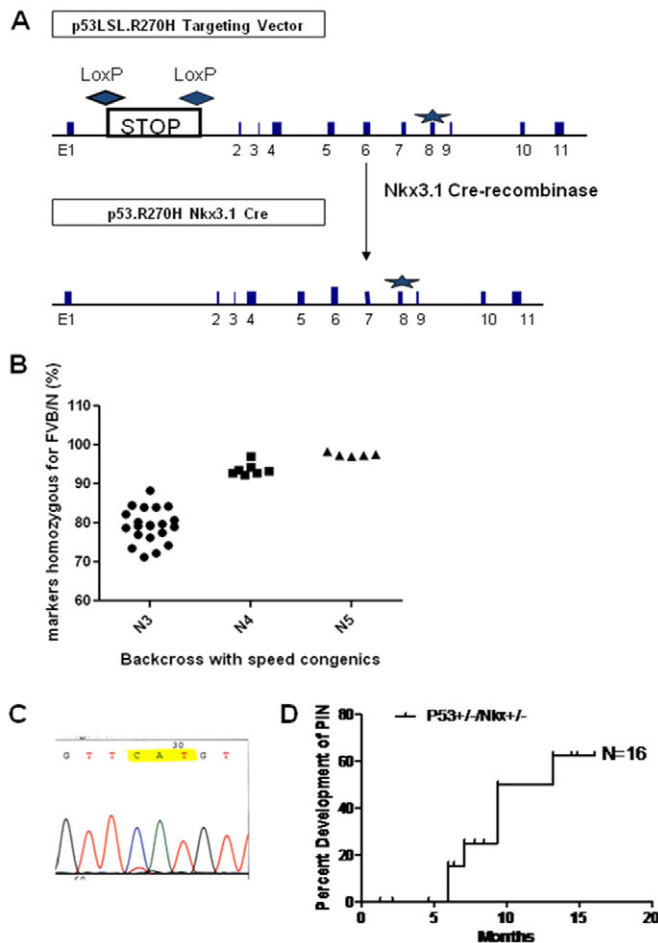

**Fig. 1. Validation and characterization of the  $Tp53^{R270H/+}$   $Nkx3.1-Cre$  mouse.** (A) Schematic representation of the targeting vector and the floxed allele following excision of the STOP cassette by  $Nkx3.1$  Cre recombinase. The R270H mutation is located in exon 8 (marked as a star). (B) Congenic backcross onto FVB/NJ was performed to ensure a uniform strain background. Speed congenics (N3 through N5) produced a close to 100% FVB/NJ congenic mouse. (C) RT-PCR and sequencing analysis of laser capture microdissected PIN lesions confirmed that  $Nkx3.1-Cre$ -mediated deletion of the floxed STOP cassette resulted in prostate-specific expression of the p53 R270H mutation. (D) Well-developed PIN lesions were observed in  $Tp53^{R270H/+}$   $Nkx3.1-Cre$  mice as early as 4 months and more than 60% of mice examined between 5 and 60 weeks developed grade 2 or higher PIN ( $n=16$ ).  $Nkx3.1$  haploinsufficient littermate mice ( $Nkx3.1-Cre$ ;  $n=6$ ), which did not express the  $Tp53$  mutation, did not develop PIN even at 60 weeks (see Fig. 2).

Cre recombinase.  $Nkx3.1-Cre$  mice were used to induce Cre-mediated deletion of the floxed STOP cassette specifically in the prostate gland.  $Nkx3.1$  is a transcription factor that is expressed in the prostate epithelium and is one of the earliest markers for prostate development (Bhatia-Gaur et al., 1999). Speed congenic backcross with medium density single-nucleotide polymorphism (SNP) analysis of strain background contribution with FVB/NJ target was performed to ensure a uniform strain background (Fig. 1B) resulting in the fully congenic strain  $FVB.129S4(Trp53^{tm3Tyj});FVB.129S(Nkx3-1^{tm3(cre)Mms})$  (hereafter abbreviated to  $Tp53^{R270H/+}$   $Nkx3.1-Cre$ ). Laser-capture

microdissection followed by RNA extraction, reverse-transcriptase PCR (RT-PCR) and sequencing confirmed the expression of the  $Tp53^{R270H}$  mutation in PIN lesions (Fig. 1C).

### Prostate-specific expression of the $Tp53$ mutant initiates early PIN lesions in $Nkx3.1-Cre$ heterozygous mice

Heterozygous  $Tp53^{R270H/+}$   $Nkx3.1-Cre$  mice with prostate-specific expression of the  $Tp53^{R270H}$  mutation ( $n=16$ ) had a high incidence of atypia or PIN grade 1 (PIN 1) with progression to PIN 2 and PIN 3 as described (Park et al., 2002), which, in homozygous  $Tp53^{R270H/R270H}$   $Nkx3.1-Cre^{+/-}$  mice, could be observed as early as 5 weeks of age (Fig. 1D, Fig. 2D-F) and, in heterozygous  $Tp53^{R270H/+}$   $Nkx3.1-Cre^{+/-}$  mice, was seen by 6 months of age. Most lesions were in the dorsolateral prostate and coagulating gland and less so in the ventral prostate. No changes were observed in the seminal vesicles or the periurethral glands.

$Nkx3.1$  haploinsufficient littermate mice ( $Nkx3.1-Cre^{+/-}$ ;  $n=6$ ) that did not express the  $Tp53$  mutation did not develop PIN of grade 2 or higher but did have some focal atypia after 12 months of age (Fig. 2A-C).  $Tp53$  mutant mice ( $Tp53^{R270H/+}$   $Nkx3.1-Cre^{+/-}$ ) younger than 6 months did not have PIN lesions of grade 2 or higher (Fig. 3A,B) but some had focal atypia seen as enlarged and hyperchromatic nuclei in small clusters with loss of cell polarity and foci of PIN grade 1, although the distinction of focal atypia and PIN 1 was subjective. Mice with homozygous  $Tp53^{R270H/R270H}$   $Nkx3.1-Cre^{+/-}$  had PIN 2 lesions as early as 4 months of age (Fig. 1D) and animals with PIN lesions of higher grades almost always had areas of lower grades of PIN as well. In one mouse, there was a single lobe/gland that demonstrated grades 1-4 of PIN (Fig. 3B). Qualitatively, Ki67 staining confirmed higher proliferation in the PIN lesions, with 40% of PIN lesion cells being positive for Ki67 (data not shown). Non-atypical adjacent or control prostate had less than 1% Ki67 positivity. The combined data infer that the  $Tp53^{R270H}$  mutation (equivalent to the human  $Tp53^{R273H}$  hotspot mutation) can mediate initiation of CaP, at least in the context of  $Nkx3.1$  haploinsufficiency and on a congenic FVB/NJ strain background. This has not previously been reported.

### Determination of $Tp53$ stabilization and expression of AR and pAKT in PIN lesions

Immunohistochemical analysis determined that  $Tp53$  is stabilized in a variable percent of cells (ranging from 10-70%) in the PIN lesions, indicating that mutant p53 is expressed by these cells (Fig. 3B, lower left panel). Occasional atypical cells with p53 stabilization, as determined by immunohistochemistry (IHC) detection, were seen in areas not recognized as PIN on hematoxylin and eosin (H&E) stains, probably representing small neoplastic initiation foci. These data indicate that the expression of the  $Tp53^{R270H}$  mutant is clonal. Future studies will focus on elucidating why this is. Rare non-atypical nuclei also had p53 positivity, but diffuse stabilization of p53 in all or most prostate epithelial cells was not seen. Androgen receptor (AR) expression was present throughout the prostate epithelium and included areas of CaP (Fig. 4A, Fig. 5B,C) and PIN (Fig. 5A). The intensity of the AR expression was decreased in many of the PIN lesions, and was undetectable in some (Fig. 2G, Fig. 5A). Levels of phosphorylated AKT (pAKT) were elevated in PIN lesions, indicating possible direct activation of the AKT pathway by expression of the  $Tp53^{R270H}$  allele (Fig. 2E,I, Fig. 3B, lower right panel). In careful analyses of the earliest lesions (as illustrated in Fig. 2D-F), p53 mutation, as

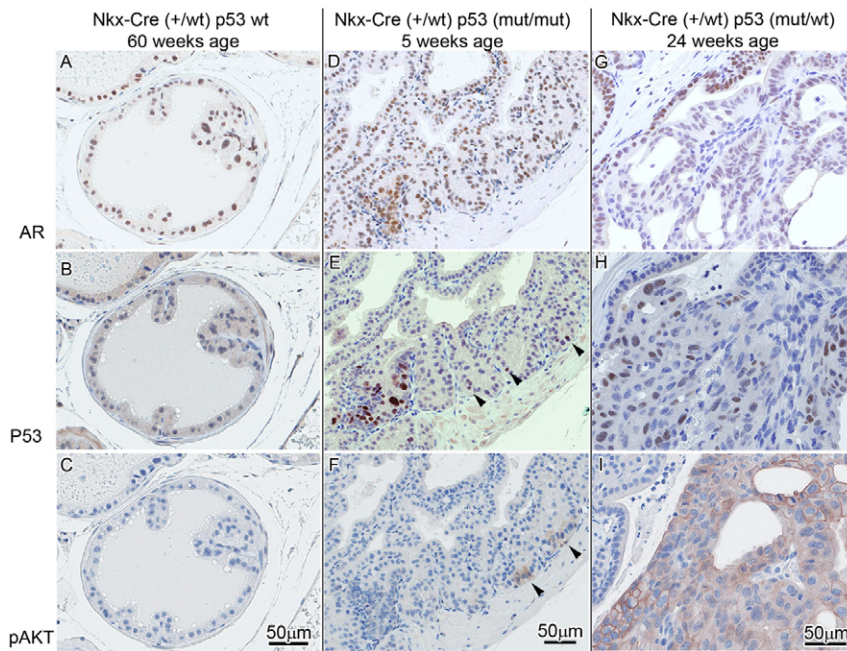

**Fig. 2. Lesion progression in  $Tp53^{R270H/+}$   $Nkx3.1$ -Cre mouse prostate.** (A-C) In  $Tp53$  wild-type mice with  $Nkx3.1$  haploinsufficiency, foci of atypia were seen in older mice (60 weeks) but are not associated with well-developed PIN. p53 (B) and pAKT (C) are negative. (D-F) Early pre-PIN atypia/PIN 1 lesion in a 5-week-old mouse with p53 mutation/stabilization as detected by IHC (bottom left and arrowheads in E) seems to precede pAKT (focally seen arrowheads in F) and AR expression in normal and atypical areas (D). (G-I) At 24 weeks, areas with p53 mutation/stabilization in PIN 3-4 are accompanied by pAKT expression (I) and decreased AR nuclear intensity and percentage (G).

detected by IHC positivity, consistent with protein stabilization, seemed to precede AKT activation/phosphorylation, and AR expression was maintained in early lesions. Reduced AR expression was seen later in more well developed PIN lesions (Fig. 2I).

#### Prostate-specific expression of the $Tp53$ mutant can mediate progression to CaP

Heterozygous  $Tp53^{R270H/+}$   $Nkx3.1$ -Cre mice developed invasive CaP by 30 weeks of age, with incomplete penetrance. Although the observed PIN lesions were typical of GEM prostate models, including the *PTEN* conditional models, the invasive tumor phenotype was not (Fig. 4).

The invasive CaP showed a distinct sarcomatoid or epithelial-mesenchymal transition (EMT) phenotype. A similar EMT phenotype has been observed with an inducible *FGFR1* mouse model; however, the involvement of p53 in that model was not reported (Acevedo et al., 2007). Tumor cells were highly atypical, and mitoses were numerous. Invasive tumor grew in solid nests and sheets, with only focal evidence of glandular or microacinar differentiation. Gleason grade for such a tumor in the human prostate would be high, numerical pattern '5' or a score of '5+5'. Cells comprising the tumor were both epithelioid and spindle, and invaded around normal glands. IHC of the CaP lesions showed p53 staining but AR expression was lost in an increasing percentage of cells and decreased in intensity even in positive cells (Fig. 5B-D). In addition, markers of EMT, including coexpression of cytokeratins 8/18 and vimentin, verify the impression that the tumor has both epithelial (CK8/18) and mesenchymal (vimentin) differentiation (Fig. 4C,E). Although p53 expression and pAKT were seen in the adjacent PIN or atypia (Fig. 2B,C, bottom left) no vimentin expression was seen in the in situ lesions. Neuroendocrine differentiation, a common feature in some mouse models with  $Tp53$  inactivation through SV40 large T antigen expression (Masumori et al., 2001; Chiaverotti et al., 2008), was not observed in the in situ

or invasive carcinomas in these mice (Fig. 2F). No metastases to other sites were observed.

#### DISCUSSION

$Tp53^{R270H/+}$   $Nkx3.1$ -Cre mice develop foci of atypia or PIN 1 as early as 5 weeks, then well-developed neoplastic foci (PIN 2 or higher) as early as 4 months of age. In early lesions,  $Tp53$  mutation, as detected by IHC positivity and confirmed by laser capture microdissection sequencing, precedes the earliest foci of AKT hyperphosphorylation, and these foci seem to give rise to the larger PIN lesions with progression to invasive carcinomas. This alternative progression model (Fig. 6) therefore challenges the conventional concept that loss of  $Tp53$  function is exclusively a late event in CaP progression and that aberrations in the PTEN-AKT pathway occur prior to  $Tp53$  mutation (Gonzalzo and Isaacs, 2003; Shen and Abate-Shen, 2010). The data suggest that  $Tp53$  mutation can be an initiating event in prostate neoplasia, and suggest that early  $Tp53$  mutation might be associated with progression towards higher grade carcinomas with tumor virulence features including EMT.

High  $Tp53$  mutation frequencies have indeed been detected in metastatic and CR CaP, with 52-89% of tumors expressing  $Tp53$  protein by IHC (Olivier et al., 2009). However, in support of our finding, our group and others have documented the occurrence of  $Tp53$  mutations in ~30% of localized human CaP (Chi et al., 1994; Heidenberg et al., 1995; Hughes et al., 1995; Bauer et al., 1996; Moul et al., 1996; Prendergast et al., 1996; Byrne et al., 1997; Meyers et al., 1998; Schlechte et al., 1998; Shi et al., 2002; Downing et al., 2003). The difference in rates of  $Tp53$  mutation reported by these studies is likely to be due in part to the different methodologies used to assess the presence of p53 mutations (for a review, see Robles and Harris, 2010). The presence of  $Tp53$  mutations has also been documented in human PIN lesions (Downing et al., 2001).

Although the role of mutant  $Tp53$  in promoting the initiation of CaP remains controversial, mutant  $Tp53$  has been shown to

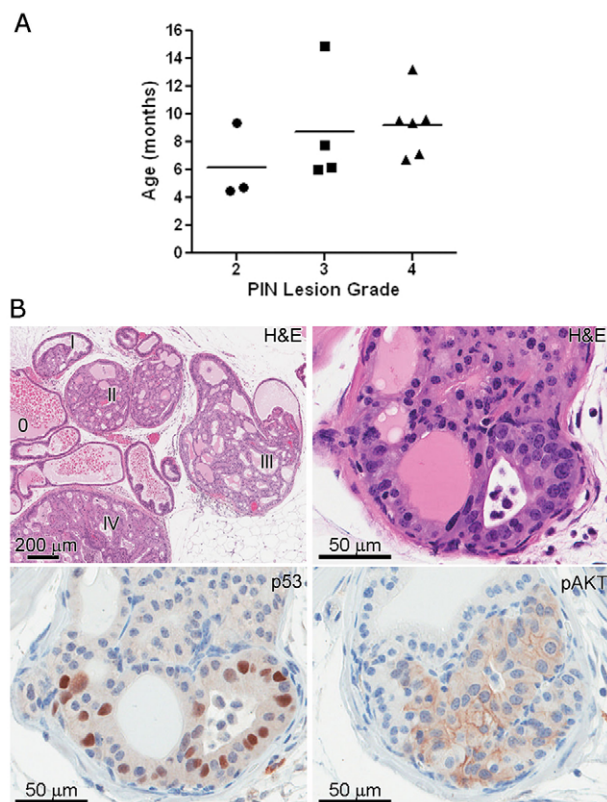

**Fig. 3. Distribution of PIN lesion grade among *Tp53<sup>R270H/+</sup> Nkx3.1-Cre* mice.** The scatterplot represents the highest grade lesion for a particular mouse (A), though often areas of lower grade were also seen (B). The horizontal line within each grade represents the mean age. Grading was performed as described previously (Park et al., 2002). Phenotypically, PIN lesions in *Tp53<sup>R270H/+</sup> Nkx3.1-Cre* mice are similar to those seen in *PTEN* conditional knockout mice (B, upper right panel and lower 2 panels). Immunohistochemical analysis determined that p53 is stabilized in 10-70% of the cells within PIN lesions (B, lower left), further validating the expression of the p53 R270H mutation in these lesions. Levels of pAKT were elevated in almost all PIN lesions (B, lower right panel).

facilitate initiation in other cancer types, for example breast, lung and esophageal cancers (Olivier et al., 2009). Several models have been proposed for defining how *Tp53* mutations infer oncogenicity (Soussi, 2007). Current data suggest that genomic instability is the most likely mechanism of action that mediates initiation of *Tp53<sup>R270H</sup>*-driven breast carcinomas (Wijnhoven et al., 2005), whereas GOF activity is important in the initiation of *Tp53<sup>R270H</sup>*-driven lung carcinomas (Olive et al., 2004). Further analysis and manipulation of our *Tp53<sup>R270H/+</sup> Nkx3.1-Cre* model will allow for elucidation of the mechanism(s) by which *Tp53<sup>R270H</sup>* drives initiation and progression of CaP.

Similar to *Tp53* mutation, inactivation of PTEN is also a frequent occurrence in individuals with CaP (Shen and Abate-Shen, 2010). Increased AKT activity suggests that PTEN inactivation might occur in our model, although PTEN status remains to be determined. The current dogma is that p53 acts as a 'failsafe' protein after loss of PTEN function. Although it is well known that combined inactivation of PTEN and *Tp53* in

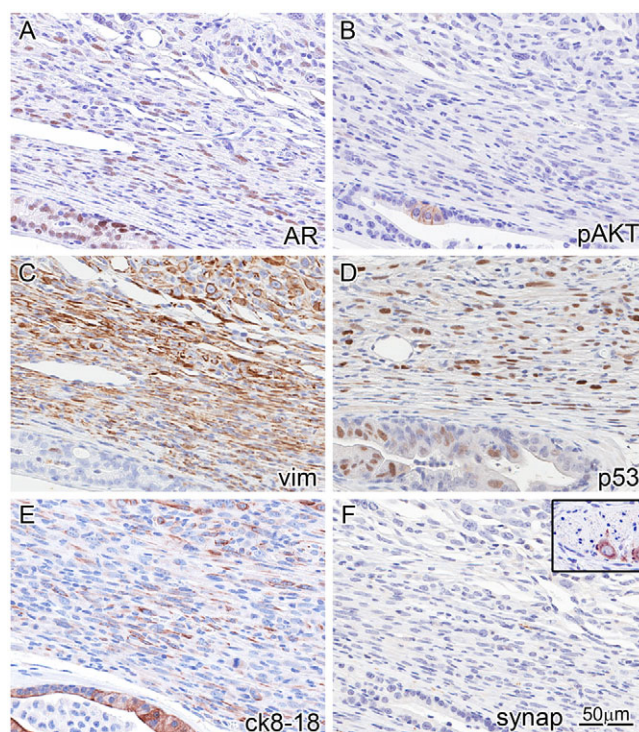

**Fig. 4. Immunophenotyping of invasive carcinoma reveals an EMT phenotype and AKT 'de-addiction'.** IHC (markers indicated lower right of each panel) on the same area (near-serial sections) of the periphery of an invasive tumor with an adjacent duct (bottom and lower left of each panel). This reveals strong AR expression in the duct, and weaker and lower percentage AR expression in the tumor cell nuclei (A). Focal pAKT is seen in the in situ atypia (B), corresponding to *Tp53* stabilization/mutation (D). The tumor co-expresses vimentin (C) and luminal CK8/18 (E), and loses expression of pAKT (B). Although AKT activation is likely to be a driver of the PIN lesions, the invasive tumor seems to be independent of AKT (is 'de-addicted'). The in situ areas are vimentin negative and cytokeratin positive (C,E). The tumor is negative for neuroendocrine differentiation as detected by a negative synaptophysin (F); inset is from the same tissue section showing a neural ganglion as internal positive control.

compound models of CaP greatly accelerates tumor development (Jeet et al., 2010), in terms of disease progression the importance of whether p53 or PTEN loss of function occurs first remains to be determined.

It should be noted that, although *Nkx3.1*-null mice do not develop PIN until 1-2 years of age, it is possible that *Nkx3.1* haploinsufficiency is required for the phenotype observed in our *Tp53<sup>R270H/+</sup> Nkx3.1-Cre* mice. CaP lesions are detected in *Tp53<sup>R270H/+</sup> Nkx3.1-Cre* mice at ~7-8 months and phenotypic markers of EMT are detected in these lesions. This finding indicates that future studies of metastatic potential are warranted in the *Tp53<sup>R270H/+</sup> Nkx3.1-Cre* mouse model. Our ongoing studies are focused on determining whether CR growth occurs in the *Tp53<sup>R270H/+</sup> Nkx3.1-Cre* mouse. In human CaP cell lines, the *Tp53<sup>R273H</sup>* mutation can mediate CR growth (Takahashi et al., 2002; Nesslering et al., 2003; Vinal et al., 2006). This model will also be used to further elucidate the mechanisms by which mutant *Tp53* promotes CaP initiation and progression.

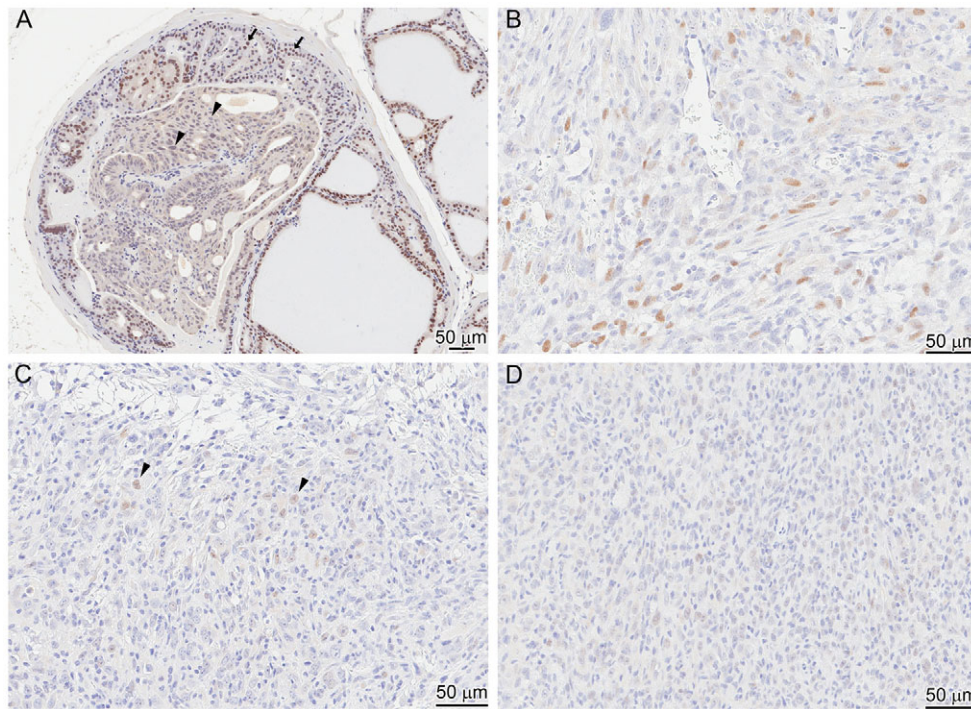

**Fig. 5. Heterogeneity of staining for AR in a PIN lesion and invasive carcinoma.** In some PIN lesions (A), AR staining of the nuclei has become faint or is even lost (arrowheads) compared with nuclei of normal prostate epithelium (arrows). In invasive carcinoma, progressive loss of AR is seen with areas of strong nuclear staining in less than 50% of tumor cells (B), weak nuclear staining in less than 20% of cells (C; arrowheads) and areas of negative nuclear AR staining (D).

**METHODS**

**Generation of conditionally inactive mutant *TP53* mice**

Mice containing a Cre-activatable *TP53*<sup>R270H</sup> knock-in allele were obtained from the Tyler Jacks Lab (Olive et al., 2004). The *loxP*-flanked conditional STOP cassette (Tuveson et al., 2004) was cloned into the *XhoI* site in intron 1 of the murine *TP53* locus. The R270H missense mutation was generated as described previously (de Vries et al., 2002). In our colony, the presence of the *loxP*-STOP-cassette-*loxP* (LSL) cassette in intron 1 of *TP53* genomic DNA is detected using the following primers to generate a wild-type band of 170 bp and a mutant band of 270 bp: wt F- 5'-TTACACATCCAGCCTCTGTGG-3'; mutant F- 5'-AGCTAGCCACCATGGCTTGAGTAAGTCTGCA-3'; R- 3'-CTTGGA-

GACATAGCCACACTG-3'. To determine the presence of the recombined alleles of mutant *TP53*, genomic DNA was amplified using the following primers flanking the integration site of the remaining *loxP* site in *TP53* intron 1: F- 5'-AGCCTGCC-TAGCTTCCTCAGG-3'; R- 5'-CTTGGAGACATAGCCACACTG-3'. The *TP53*<sup>R270H</sup> (amino acid 270 in mice *TP53* corresponds to 273 in human *TP53*) mutant has a wild-type *TP53* conformation but is defective in DNA binding, because R270H is in the DNA-binding domain of *TP53*. The *Nkx3.1-Cre* mouse is a knock-out/knock-in mouse in which the *Nkx3.1* coding region is replaced with the Cre recombinase coding sequence to result in prostate-specific expression of Cre, but also an *Nkx3.1*-null allele (Lin et al., 2007; Thomsen et al., 2008). The presence of wild-type

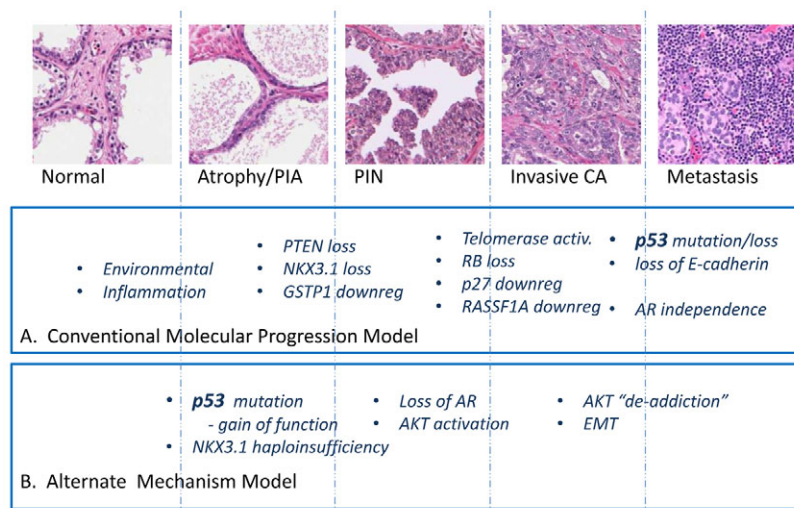

**Fig. 6. Schematic diagram of alternative molecular progression in prostate cancer compared with conventional model.** CA, carcinoma; PIA, proliferative inflammatory atrophy.

## TRANSLATIONAL IMPACT

### Clinical issue

*Tp53* mutations are common in prostate cancer (CaP), occurring with a frequency of ~30% in localized disease and ~70% in metastatic disease. Although multiple studies have documented a link between mutations in *Tp53* and disease progression in individuals with CaP, *Tp53* mutation is generally believed to be a late event in tumor evolution. In mouse models of germline *Tp53* mutations, prostatic intraepithelial neoplasia (PIN) is not reported; however, because sarcomas and lymphomas develop rapidly and frequently in these mice, it has been unclear whether *Tp53* mutations simply do not have time to impact the prostate. Here, the authors sought to address this issue by engineering mice carrying a prostate-conditional *Tp53* knock-in mutation. They chose to model the *Tp53*<sup>R270H</sup> mutation (which is directly analogous to the common human 'hotspot' mutation *Tp53*<sup>R273H</sup>) because it is frequently observed in human CaP, and because it is associated with an androgen-insensitive gain of function.

### Results

Heterozygous *Tp53*<sup>LSL-R270H/+;Nkx3.1-Cre</sup> mice with prostate-specific expression of the *Tp53*<sup>R270H</sup> mutation were generated and bred onto a fully congenic FVB/NJ background. The effect of prostate-specific expression of the *Tp53*<sup>R270H</sup> mutation on disease progression was characterized over a 16-month period. Compared with *Nkx3.1* haploinsufficient mice (*Nkx3.1-Cre*), which did not express the *Tp53* mutation, *Tp53*<sup>R270H/+;Nkx3.1-Cre</sup> littermate mice had a significantly increased incidence of PIN lesions and these appeared at earlier time points. PIN lesions showed consistent progression and invasive carcinoma with a high-grade sarcomatoid or epithelial-mesenchymal transition phenotype. These PIN lesions were similar to those observed in *PTEN* conditional knockout mice, with evidence of AKT activation concomitant with neoplastic proliferation.

### Implications and future directions

These data demonstrate that the *Tp53*<sup>R270H</sup> mutation plays a role in both the initiation and development of CaP in mice. In the late stages of progression, the mutation can confer an aggressive cancer phenotype. Interestingly, however, the engineered mutation also seems to contribute to initiation of early PIN lesions in the prostate. This has not been previously reported; even in studies in which the identical knock-in mutation was expressed in all tissues, prostates were found to be normal. Future studies will focus on determining how the *Tp53*<sup>R270H</sup> mutation impacts the effectiveness of agents frequently used to treat patients with CaP, particularly androgen ablation and radiation therapy.

and/or *Cre* alleles at *Nkx3.1* were determined using primers: F- 5'-CAGATGGGCGCGCAACACC-3'; R- 5'-GCGCGGTCTGGC-AGTAAAAAC-3'. In a speed congenics backcross strategy, using the Illumina medium density mouse SNP panel service through the UC Davis Mouse Biology Program Genetic Analysis Laboratory, these mice have been bred onto a fully congenic FVB/NJ strain background. All animal procedures were reviewed and approved by the UC Davis Institutional Animal Care and Use Committee (IACUC). The generation of the CaP *Tp53*<sup>R270H</sup> mouse is outlined in Fig. 1.

### Congenicity to an FVB/NJ strain background

Mixed strain background (C57B6/129svj) mice bearing the *Nkx3.1-Cre* knock-in allele and mice bearing the Flox-STOP R270H *Tp53* conditional allele were bred with wild-type FVB/NJ mice (Jackson Laboratory, Bar Harbor, ME), screened for target allele positivity by tail DNA PCR (as above), and then 'best males' for speed congenicity were selected by medium density SNP analysis (Illumina, San Diego, CA) in the UC Davis Mouse Biology Program

Murine Genetic Analysis Laboratory. Five generations of speed selected backcrossing were performed after two initial generations of non-speed backcross to FVB/NJ.

### Microdissection, PCR and sequencing

RNA isolated from microdissected PIN lesion was amplified with the following primers to validate expression of *Tp53*<sup>R270H</sup> mRNA: Forward primer 5'-TTCTGGGACGGGACAGCTTTG-3', Reverse primer 5'-GAAATACGCTCCATCAAGTG-3'. PCR products were purified using Takara recoclips (Clontech, Madison, WI) and sequenced in both directions at the UC Davis Department of Biological Sciences DNA sequencing core facility.

### Histopathology and immunohistochemistry

Standard histopathology and IHC was performed as described previously (Park et al., 2002). The presence and number of PIN lesions was assessed by pathological analysis of H&E-stained sections. PIN lesion grades for GEM are described elsewhere (Park et al., 2002). Primary antibodies used were anti-Ki67 Ab-4 (1:500; Neomarker, Fremont, CA), anti-pAKT (1:2000; Cell Signaling, Danvers, MA), anti-CK8/18 (1:2000; Fitzgerald, Acton, MA), anti-AR (Millipore, Billerica, MA), anti-vimentin (Epitomics, Burlingame, CA), anti-p53 (Santa Cruz Biotech, Santa Cruz, CA) and anti-synaptophysin (Invitrogen, Carlsbad, CA).

### ACKNOWLEDGEMENTS

We wish to thank Tyler Jacks, Kenneth Olive and David Tuveson for providing us with the mice containing a Cre-activatable *Tp53*<sup>R270H</sup> knock-in allele, and Katie Bell for histotechnology. We also thank Brandon Willis for medium density SNP analysis used in the speed congenicity.

### COMPETING INTERESTS

The authors declare that they do not have any competing or financial interests.

### AUTHOR CONTRIBUTIONS

A.D.B. and R.W.D.W. conceived the idea for the mouse model, S.S.S., M.M.S. and A.D.B. generated the mouse model, R.L.V. and J.Q.C. characterized the mouse model, J.Q.C. genotyped the mice and dissected the tissues, and R.L.V., N.E.H. and A.D.B. prepared the manuscript.

### FUNDING

This work was supported by the National Institutes of Health, including the National Cancer Institute [U01 CA141582 (to A.D.B.); 1P01CA154293-01A1 (to M.M.S.); 3P30CA093373-09S3 (to R.D.W.)] and the National Center for Research Resources [K26 RR024037 (to A.D.B.)]; and by a grant from the University of California Davis, School of Medicine, Department of Pathology, Advisory Research Committee (to A.D.B.).

### REFERENCES

- Acevedo, V. D., Gangula, R. D., Freeman, K. W., Li, R., Zhang, Y., Wang, F., Ayala, G. E., Peterson, L. E., Ittmann, M. and Spencer, D. M. (2007). Inducible FGFR-1 activation leads to irreversible prostate adenocarcinoma and an epithelial-to-mesenchymal transition. *Cancer Cell* **12**, 559-571.
- Bauer, J. J., Sesterhenn, I. A., Mostofi, F. K., McLeod, D. G., Srivastava, S. and Moul, J. W. (1996). Elevated levels of apoptosis regulator proteins p53 and bcl-2 are independent prognostic biomarkers in surgically treated clinically localized prostate cancer. *J. Urol.* **156**, 1511-1516.
- Bhatia-Gaur, R., Donjacour, A. A., Sciovino, P. J., Kim, M., Desai, N., Young, P., Norton, C. R., Gridley, T., Cardiff, R. D., Cunha, G. R. et al. (1999). Roles for *Nkx3.1* in prostate development and cancer. *Genes Dev.* **13**, 966-977.
- Byrne, R. L., Horne, C. H., Robinson, M. C., Autzen, P., Apakama, I., Bishop, R. I., Neal, D. E. and Hamdy, F. C. (1997). The expression of waf-1, p53 and bcl-2 in prostatic adenocarcinoma. *Br. J. Urol.* **79**, 190-195.
- Chi, S. G., de Vere White, R. W., Meyers, F. J., Siders, D. B., Lee, F. and Gumerlock, P. H. (1994). p53 in prostate cancer: frequent expressed transition mutations. *J. Natl. Cancer Inst.* **86**, 926-933.
- Chiaverotti, T., Couto, S. S., Donjacour, A., Mao, J. H., Nagase, H., Cardiff, R. D., Cunha, G. R. and Balmain, A. (2008). Dissociation of epithelial and neuroendocrine

- carcinoma lineages in the transgenic adenocarcinoma of mouse prostate model of prostate cancer. *Am. J. Pathol.* **172**, 236-246.
- de Vries, A., Flores, E. R., Miranda, B., Hsieh, H. M., van Oostrom, C. T., Sage, J. and Jacks, T.** (2002). Targeted point mutations of p53 lead to dominant-negative inhibition of wild-type p53 function. *Proc. Natl. Acad. Sci. USA* **99**, 2948-2953.
- Downing, S. R., Jackson, P. and Russell, P. J.** (2001). Mutations within the tumour suppressor gene p53 are not confined to a late event in prostate cancer progression. a review of the evidence. *Urol. Oncol.* **6**, 103-110.
- Downing, S. R., Russell, P. J. and Jackson, P.** (2003). Alterations of p53 are common in early stage prostate cancer. *Can. J. Urol.* **10**, 1924-1933.
- Elgavish, A., Wood, P. A., Pinkert, C. A., Eltoun, I. E., Cartee, T., Wilbanks, J., Mentor-Marcel, R., Tian, L. and Scroggins, S. E.** (2004). Transgenic mouse with human mutant p53 expression in the prostate epithelium. *Prostate* **61**, 26-34.
- Gonzalvo, M. L. and Isaacs, W. B.** (2003). Molecular pathways to prostate cancer. *J. Urol.* **170**, 2444-2452.
- Heidenberg, H. B., Sesterhenn, I. A., Gaddipati, J. P., Weghorst, C. M., Buzard, G. S., Moul, J. W. and Srivastava, S.** (1995). Alteration of the tumor suppressor gene p53 in a high fraction of hormone refractory prostate cancer. *J. Urol.* **154**, 414-421.
- Hughes, J. H., Cohen, M. B. and Robinson, R. A.** (1995). p53 immunoreactivity in primary and metastatic prostatic adenocarcinoma. *Mod. Pathol.* **8**, 462-466.
- Jeet, V., Russell, P. J. and Khatri, A.** (2010). Modeling prostate cancer: a perspective on transgenic mouse models. *Cancer Metastasis Rev.* **29**, 123-142.
- Lin, Y., Liu, G., Zhang, Y., Hu, Y. P., Yu, K., Lin, C., McKeehan, K., Xuan, J. W., Ornitz, D. M., Shen, M. M. et al.** (2007). Fibroblast growth factor receptor 2 tyrosine kinase is required for prostatic morphogenesis and the acquisition of strict androgen dependency for adult tissue homeostasis. *Development* **134**, 723-734.
- Masumori, N., Thomas, T. Z., Chaurand, P., Case, T., Paul, M., Kasper, S., Caprioli, R. M., Tsukamoto, T., Shappell, S. B. and Matusik, R. J.** (2001). A probasin-large T antigen transgenic mouse line develops prostate adenocarcinoma and neuroendocrine carcinoma with metastatic potential. *Cancer Res.* **61**, 2239-2249.
- Meyers, F. J., Gumerlock, P. H., Chi, S. G., Borchers, H., Deitch, A. D. and deVere White, R. W.** (1998). Very frequent p53 mutations in metastatic prostate carcinoma and in matched primary tumors. *Cancer* **83**, 2534-2539.
- Moul, J. W., Bettencourt, M. C., Sesterhenn, I. A., Mostofi, F. K., McLeod, D. G., Srivastava, S. and Bauer, J. J.** (1996). Protein expression of p53, bcl-2, and Ki-67 (MIB-1) as prognostic biomarkers in patients with surgically treated, clinically localized prostate cancer. *Surgery* **120**, 159-166; discussion 166-167.
- Navone, N. M., Troncoso, P., Pisters, L. L., Goodrow, T. L., Palmer, J. L., Nichols, W. W., von Eschenbach, A. C. and Conti, C. J.** (1993). p53 protein accumulation and gene mutation in the progression of human prostate carcinoma. *J. Natl. Cancer Inst.* **85**, 1657-1669.
- Nesslinger, N. J., Shi, X. B. and deVere White, R. W.** (2003). Androgen-independent growth of LNCaP prostate cancer cells is mediated by gain-of-function mutant p53. *Cancer Res.* **63**, 2228-2233.
- Olive, K. P., Tuveson, D. A., Ruhe, Z. C., Yin, B., Willis, N. A., Bronson, R. T., Crowley, D. and Jacks, T.** (2004). Mutant p53 gain of function in two mouse models of Li-Fraumeni syndrome. *Cell* **119**, 847-860.
- Olivier, M., Petitjean, A., Marcel, V., Petre, A., Mounawar, M., Plymoth, A., de Fromental, C. C. and Hainaut, P.** (2009). Recent advances in p53 research: an interdisciplinary perspective. *Cancer Gene Ther.* **16**, 1-12.
- Park, J. H., Walls, J. E., Galvez, J. J., Kim, M., Abate-Shen, C., Shen, M. M. and Cardiff, R. D.** (2002). Prostatic intraepithelial neoplasia in genetically engineered mice. *Am. J. Pathol.* **161**, 727-735.
- Prendergast, N. J., Atkins, M. R., Schatte, E. C., Paulson, D. F. and Walther, P. J.** (1996). p53 immunohistochemical and genetic alterations are associated at high incidence with post-irradiated locally persistent prostate carcinoma. *J. Urol.* **155**, 1685-1692.
- Robles, A. I. and Harris, C. C.** (2010). Clinical outcomes and correlates of TP53 mutations and cancer. *Cold Spring Harb. Perspect. Biol.* **2**, a001016.
- Schlechte, H., Lenk, S. V., Loning, T., Schnorr, D., Rudolph, B. D., Ditscherlein, G. and Loening, S. A.** (1998). p53 tumour suppressor gene mutations in benign prostatic hyperplasia and prostate cancer. *Eur. Urol.* **34**, 433-440.
- Shen, M. M. and Abate-Shen, C.** (2010). Molecular genetics of prostate cancer: new prospects for old challenges. *Genes Dev.* **24**, 1967-2000.
- Shi, X. B., Di Mauro, S. M., Highshaw, R., Deitch, A. D., Evans, C. P., Gumerlock, P. H. and deVere White, R. W.** (2002). Application of a yeast assay to detect functional p53 mutations in archival prostate cancer tissue. *Cancer Biother. Radiopharm.* **17**, 657-664.
- Soussi, T.** (2007). p53 alterations in human cancer: more questions than answers. *Oncogene* **26**, 2145-2156.
- Takahashi, T., Munakata, M., Ohtsuka, Y., Nisihara, H., Nasuhara, Y., Kamachi-Satoh, A., Dosaka-Akita, H., Homma, Y. and Kawakami, Y.** (2002). Expression and alteration of ras and p53 proteins in patients with lung carcinoma accompanied by idiopathic pulmonary fibrosis. *Cancer* **95**, 624-633.
- Thomsen, M. K., Butler, C. M., Shen, M. M. and Swain, A.** (2008). Sox9 is required for prostate development. *Dev. Biol.* **316**, 302-311.
- Tomkova, K., Tomka, M. and Zajac, V.** (2008). Contribution of p53, p63, and p73 to the developmental diseases and cancer. *Neoplasma* **55**, 177-181.
- Tuveson, D. A., Shaw, A. T., Willis, N. A., Silver, D. P., Jackson, E. L., Chang, S., Mercer, K. L., Grochow, R., Hock, H., Crowley, D. et al.** (2004). Endogenous oncogenic K-ras(G12D) stimulates proliferation and widespread neoplastic and developmental defects. *Cancer Cell* **5**, 375-387.
- Vinall, R. L., Tepper, C. G., Shi, X. B., Xue, L. A., Gandour-Edwards, R. and deVere White, R. W.** (2006). The R273H p53 mutation can facilitate the androgen-independent growth of LNCaP by a mechanism that involves H2 relaxin and its cognate receptor LGR7. *Oncogene* **25**, 2082-2093.
- Wijnhoven, S. W., Zwart, E., Speksnijder, E. N., Beems, R. B., Olive, K. P., Tuveson, D. A., Jonkers, J., Schaap, M. M., van den Berg, J., Jacks, T. et al.** (2005). Mice expressing a mammary gland-specific R270H mutation in the p53 tumor suppressor gene mimic human breast cancer development. *Cancer Res.* **65**, 8166-8173.
